# Supplementary material
Source: bioRxiv or medRxiv preprint supplement (https://www.biorxiv.org/content/biorxiv/early/2020/04/25/2020.04.25.058891.1/DC2/embed/media-2.pdf)
Supplement: Supplementary file [file media-2.pdf]

## 1 **DNA extraction and library preparation.**

2 Genomic DNA was isolated from two grams of field-grown apple leaves according to the PacBio “Preparing  
3 Arabidopsis Genomic DNA for Size-Selected ~20 kb SMRTbell Libraries” protocol. Quantification and quality  
4 assessment was made using the Qubit Fluorometer dsDNA Broad Range assay (Thermo Fisher Scientific,  
5 Waltham, MA, USA) and the Bioanalyzer 2100 12K DNA Chip assay (Agilent Technologies, Santa Clara, CA, USA),  
6 respectively. The libraries were sequenced using PacBio RSII and Sequel instruments. On the PacBio RSII  
7 instrument, libraries were sequenced with SMRT bell-Polymerase Complex using the P6 DNA/Polymerase binding  
8 kit 2.0 (Pacific Biosciences, Menlo Park, CA, USA) according to the manufacturer's instructions. The complex was  
9 loaded into a SMRT cell v3.0 (Pacific Biosciences), recording a series of microscope pictures for a period of six  
10 hours. On the PacBio Sequel instrument, the libraries were sequenced with SMRT bell-Polymerase Complex  
11 created using the Sequel binding kit 1.0 (Pacific Biosciences) according to the manufacturer instructions. The  
12 PacBio Sequel instrument was programmed to load the sample on a Sequel SMRT Cell 1M (Pacific Biosciences).  
13 The SMRT cell was sequenced recording a series of microscope pictures for a period of ten hours with a Sequel  
14 Sequencing 1.21 chemistry (Pacific Biosciences). For both the RSII and Sequel, a MagBead loading V2 (Pacific  
15 Biosciences) method was used to enrich for longer fragments. The complete PacBio sequence dataset was *de novo*  
16 assembled with FALCON Unzip, v.0.4.0 (Chin, et al. 2016) using a plant-specific configuration file ([fc\\_run\\_plant.cfg](#)).  
17 For polishing and genome size estimation, the same gDNA sample of 'Gala Galaxy' used for PacBio library  
18 preparation was also used to prepare Illumina libraries (Illumina TruSeq Nano DNA Library Preparation, Illumina,  
19 San Francisco, CA, USA) with an average insert size of 500 bp. Arrow was the polishing option chosen when  
20 applying the variantCaller v.2.3.3 implementation bundled in SMRT Link v 5.1.0. The genome size was estimated  
21 using Jellyfish 2.2.6 (Marçais and Kingsford 2011) and the `estimate_genome_size` script  
22 ([https://github.com/josephryan/estimate\\_genome\\_size.pl](https://github.com/josephryan/estimate_genome_size.pl)) and the forward reads (R1) of the Illumina sequenced  
23 library of 'Gala Galaxy'.

## 24 **Hybrid scaffolding**

25 To increase the contiguity and to phase the contigs generated by FALCON Unzip, two optical maps were  
26 constructed using different labelling kits. These were combined to generate dual enzyme hybrid scaffolds. To  
27 generate the optical maps, DNA was extracted from four grams of apple leaves of 'Gala Galaxy'. These samples  
28 were prepared with the Plant DNA Isolation kit (Bionano Genomics, San Diego, CA, USA) following the Bionano  
29 Prep Plant Tissue DNA Isolation Base Protocol (Document Number 30068 Rev C). The Bionano Irys and Saphyr  
30 platforms generated optical maps using DNA labeled with DLS and NLRs kits, respectively. For DLS, DNA was  
31 labeled using the Bionano Prep DNA Labeling Kit-DLS (Bionano Genomics) according to manufacturer's  
32 instructions. A total of 750 ng of purified genomic DNA was labeled with DLE labeling Mix and subsequently  
33 incubated with Proteinase K (Qiagen, Hilden, DE) followed by drop dialysis. After the clean-up step, the DNA was

34 pre-stained, homogenized, and quantified using on a Qubit Fluorometer to establish the appropriate amount of  
35 backbone stain. The staining reaction was incubated at room temperature for at least two hours. For NLRS, DNA  
36 was labeled according to manufacturer's instructions using the Prep DNA Labeling Kit-NLRS (Bionano Genomics,).  
37 Three-hundred nanograms of purified genomic DNA were treated with Nb.BspQI (New England Biolabs, Ipswich,  
38 MA, USA) in NEB Buffer 3. The nicked DNA was labeled with a fluorescent-dUTP nucleotide analog using Taq DNA  
39 polymerase (New England BioLabs). After labeling, nicks were repaired with Taq DNA ligase (New England  
40 BioLabs) in the presence of dNTPs. The backbone of fluorescently labeled DNA was counterstained overnight with  
41 YOYO-1 (Bionano Genomics). The *de novo* assembly of the optical maps was performed using the Bionano Access  
42 v1.2.1 and Bionano Solve v3.2.1 software. The assembly type performed was the "haplotype" with "no extend split"  
43 and "no cut segdups". Default parameters were adjusted to accommodate the genomic properties of the apple  
44 genome. Specifically, the minimal length for the molecules to be used in the assembly was 150 kb, the "Initial P-  
45 value" cut off threshold was adjusted to  $1 \times 10^{-11}$  and the P-value cut off threshold for extension and refinement was  
46 set to  $1 \times 10^{-12}$  according to manufacturer's guidelines.

#### 47 **Scaffolds anchoring to a genetic map and to a previously reported haploid genome**

48 Sequences flanking the SNP markers from the genetic map of 'Fuji' × 'Gala' (Di Pierro, et al. 2016) were BLAST  
49 searched against the hybrid assembly, retaining only the hits with highest bit score. Physical position and genetic  
50 position of each SNP served as input for ALLMAPS anchoring. In addition, the assembly was anchored to the  
51 doubled-haploid reference GDDH13 assembly (Daccord, et al. 2017) by means of aligning GDDH13's coding  
52 sequences through BLAST

#### 53 **RNA extraction and library preparation.**

54 RNA was extracted using the Quick-RNA MiniPrep Kit (Zymo Research, Irvine, CA, USA) following the  
55 manufacturer's protocol with the exception that RNA was eluted twice with 35µl DNase free water. Residual DNA  
56 was digested with 1 µl DNaseI (DNA-free DNA removal kit, Thermo Fisher Scientific, Waltham, MA, USA).  
57 Complementary RNA libraries were created using the TrueSeq@RNA (Illumina, San Diego, CA, USA) kit, including  
58 a polyA purification step according to manufacturer protocol.

#### 59 **Genome visualization for coverage and phase analysis of the assembled chromosomes**

60 To further evaluate the correctness of the genome assembly, diagnostic genome features were visualized in  
61 RStudio (Version 1.2.5001) using the karyoploteR package (Gel and Serra 2017). Illumina read coverage, genetic  
62 phase, and correlation of genetic and physical order on the assembly were assessed within and across  
63 pseudomolecules. Furthermore, homologous regions between each haploid assembly were visualized. By  
64 inspecting the Illumina read coverage distribution, homozygous regions in the genome, in which both haplotypes  
65 were collapsed to a single sequence, were identified. Such regions displayed a coverage two-fold higher when

66 compared to regions assembled in two separate haplotypes. The coverage of the assembly by Illumina reads was  
67 calculated from the bam-file generated by mapping the Illumina paired-end reads using the “Map to reference  
68 function” in CLC genomics workbench 11.0 (Length fraction = 0.8, Similarity fraction = 0.95 and ignoring non-specific  
69 matches). Phase information published with the genetic map of 'Fuji' × 'Gala' (Di Pierro, et al. 2016) was used to  
70 determine the phase of each SNP in the two haploid assemblies (therefore using only SNP markers heterozygous  
71 in 'Gala'). The two sequences corresponding to the two alleles in 'Gala' for each SNP locus were generated and  
72 BLAST-searched separately on the primary and secondary haploid assemblies. BLAST hits were then parsed to  
73 allocate the polymorphisms to the primary and secondary haploid assemblies. The SNPs BLAST hits used for  
74 ALLMAPS-based anchoring served also for generating the links between primary and secondary assembly. In  
75 addition, the genetic position (in cM) of the SNP markers was included in order to visualize the collinearity of genetic  
76 and physical map.

### 77 **Graph-based assembly**

78 The primary haploid assembly MDGGph\_v1.0 was used as haploid reference for graph-based (WhatsHap)  
79 assembly of the genome (Patterson, et al. 2015) with default settings. Pacbio and Illumina reads were mapped to  
80 the reference genome and WhatsHap generated two versions of the haploid reference that should correspond to  
81 the two phased haploid genomes. The KAT was used as described above to evaluate the completeness of the  
82 resulting diploid phased genome in comparison with the GDDH13 assembly and the unphased diploid assembly  
83 MDGGdi\_v1.0
